# Supplementary material
Source: HighWire-hosted journal article supplement (https://bmjopenquality.bmj.com/content/12/2/e002156)
Supplement: inline-supplementary-material-1 [file inline-supplementary-material-1.pdf]

## Appendix 1

### Suspected urinary tract infections in patients $\geq 18$ years

Register solely on the basis of the day of the first contact to general practice (day one)

| Patient information      |                                        |                                                                                                                                                                                                                                                                                                                                                                                                                                                                                                                             |
|--------------------------|----------------------------------------|-----------------------------------------------------------------------------------------------------------------------------------------------------------------------------------------------------------------------------------------------------------------------------------------------------------------------------------------------------------------------------------------------------------------------------------------------------------------------------------------------------------------------------|
| 1                        | Patient age                            | _____ years                                                                                                                                                                                                                                                                                                                                                                                                                                                                                                                 |
| 2                        | Patient sex                            | <input type="checkbox"/> Female<br><input type="checkbox"/> Male                                                                                                                                                                                                                                                                                                                                                                                                                                                            |
| 3                        | Patient background (choose at least 1) | <input type="checkbox"/> Nursing home resident<br><input type="checkbox"/> Urinary catheter<br><input type="checkbox"/> Recurring UTI<br><input type="checkbox"/> Comorbidity<br><input type="checkbox"/> Pregnant<br><input type="checkbox"/> Penicillin allergy<br><br><input type="checkbox"/> None of the above                                                                                                                                                                                                         |
| Symptoms and signs       |                                        |                                                                                                                                                                                                                                                                                                                                                                                                                                                                                                                             |
| 4                        | Symptoms and signs (choose at least 1) | <input type="checkbox"/> Dysuria<br><input type="checkbox"/> Urgency<br><input type="checkbox"/> Frequency<br><input type="checkbox"/> New-onset incontinence<br><input type="checkbox"/> Suprapubic pain<br><input type="checkbox"/> Flank pain<br><input type="checkbox"/> Fever<br><input type="checkbox"/> Shivering<br><input type="checkbox"/> Systemically unwell<br><input type="checkbox"/> New-onset confusion<br><input type="checkbox"/> None of the above<br><br><input type="checkbox"/> No symptoms reported |
| Examinations             |                                        |                                                                                                                                                                                                                                                                                                                                                                                                                                                                                                                             |
| 5                        | Urinary dipstick (choose at least 1)   | <b>Nitrite</b><br><input type="checkbox"/> Positive<br><input type="checkbox"/> Negative<br><b>Leukocytes</b><br><input type="checkbox"/> Positive<br><input type="checkbox"/> Negative<br><b>Hemoglobin</b><br><input type="checkbox"/> Positive<br><input type="checkbox"/> Negative<br><br><input type="checkbox"/> Not performed                                                                                                                                                                                        |
| Examinations (continued) |                                        |                                                                                                                                                                                                                                                                                                                                                                                                                                                                                                                             |
| 6                        | Microscopy (choose only 1)             | <b>Microscopy</b><br><input type="checkbox"/> Positive<br><input type="checkbox"/> Negative<br><input type="checkbox"/> Inconclusive<br><br><input type="checkbox"/> Not performed                                                                                                                                                                                                                                                                                                                                          |
| 7                        | Urine culture (choose only 1)          | <input type="checkbox"/> Urine culture in general practice<br><input type="checkbox"/> Susceptibility testing in general practice<br><input type="checkbox"/> Urine sent to Department of Clinical Microbiology<br><br><input type="checkbox"/> Not performed                                                                                                                                                                                                                                                               |
| 8                        | CRP (mg/l or 1 cross)                  | CRP (value in mg/L) _____<br><br><input type="checkbox"/> Not performed                                                                                                                                                                                                                                                                                                                                                                                                                                                     |
| Diagnose                 |                                        |                                                                                                                                                                                                                                                                                                                                                                                                                                                                                                                             |
| 9                        | Diagnose (choose only 1)               | <input type="checkbox"/> Uncomplicated lower UTI<br><input type="checkbox"/> Complicated lower UTI<br><input type="checkbox"/> Pyelonephritis<br><input type="checkbox"/> Other, not UTI<br><input type="checkbox"/> Unresolved                                                                                                                                                                                                                                                                                             |
| Action                   |                                        |                                                                                                                                                                                                                                                                                                                                                                                                                                                                                                                             |
| 10                       | Hospitalisation (choose only 1)        | <input type="checkbox"/> Yes<br><input type="checkbox"/> No                                                                                                                                                                                                                                                                                                                                                                                                                                                                 |
| 11                       | Antibiotics (choose at least 1)        | <input type="checkbox"/> Pivmecillinam<br><input type="checkbox"/> Sulfametizol<br><input type="checkbox"/> Nitrofurantoin<br><input type="checkbox"/> Trimethoprim<br><input type="checkbox"/> Ciprofloxacin<br><input type="checkbox"/> Other antibiotic<br><br><input type="checkbox"/> No antibiotics (day 1)                                                                                                                                                                                                           |
